# Supplementary material
Source: PubMed Central journal article supplement (PMC11028696)
Supplement: 262_2010_965_MOESM1_ESM.pdf [file 262_2010_965_MOESM1_ESM.pdf]

## Supplementary figure legends

**Suppl. Fig.1** The relative contribution of NKG2D and DNAM-1 ligands to the lysis of SAOS-2 and its chemotherapy resistant variants was similar, as demonstrated by blocking DNAM-1, NKG2D or both receptors on unstimulated (**a**) and IL-15 activated (**b**) NK cells. Similar results were obtained in U2-OS (**c** and **d**). Error bars represent standard error of the mean lysis in at least three independent experiments using healthy donor NK cells. DX; doxorubicin resistant variant, MTX; methotrexate resistant variant, CDDP; cisplatinium resistant variant.

**Suppl. Fig.2 a**, representative example of flow cytometry results of unstimulated peripheral NK cell compartment. The CD3 CD56 plot was gated on lymphocytes based on forward and sideward scatter. Monocytes were gated out by excluding CD14 stained cells (not shown). NK cells were defined as CD3-CD56+ cells and were divided in a CD56 bright and a CD56 dim subset. Expression of NKG2D, DNAM-1, CD16, perforin and granzyme B was determined for CD56 bright (black histogram and dots) and CD56 dim (grey histogram and dots) subsets. **b**, patients and controls had similar numbers of NK cells. **c**, following culture for 3 days in IL15, there was a larger increase in expression level of Granzyme B in NK cells of patients than of healthy controls. Patients and controls had similar levels of CD16, DNAM-1 and perforin on NK cells. In both patients and healthy controls, levels of CD16 decreased in CD56dim and bright NK cells and levels of perforin increased in CD56bright and decreased in CD56dim NK cells upon IL-

15 treatment. ANOVA,  $P$ -value  $<0.0001$ . Bonferroni's multiple comparison post-test;  $P$ -value  $<0.05$  noted as \*;  $<0.01 = **$ ;  $<0.001 = ***$ .

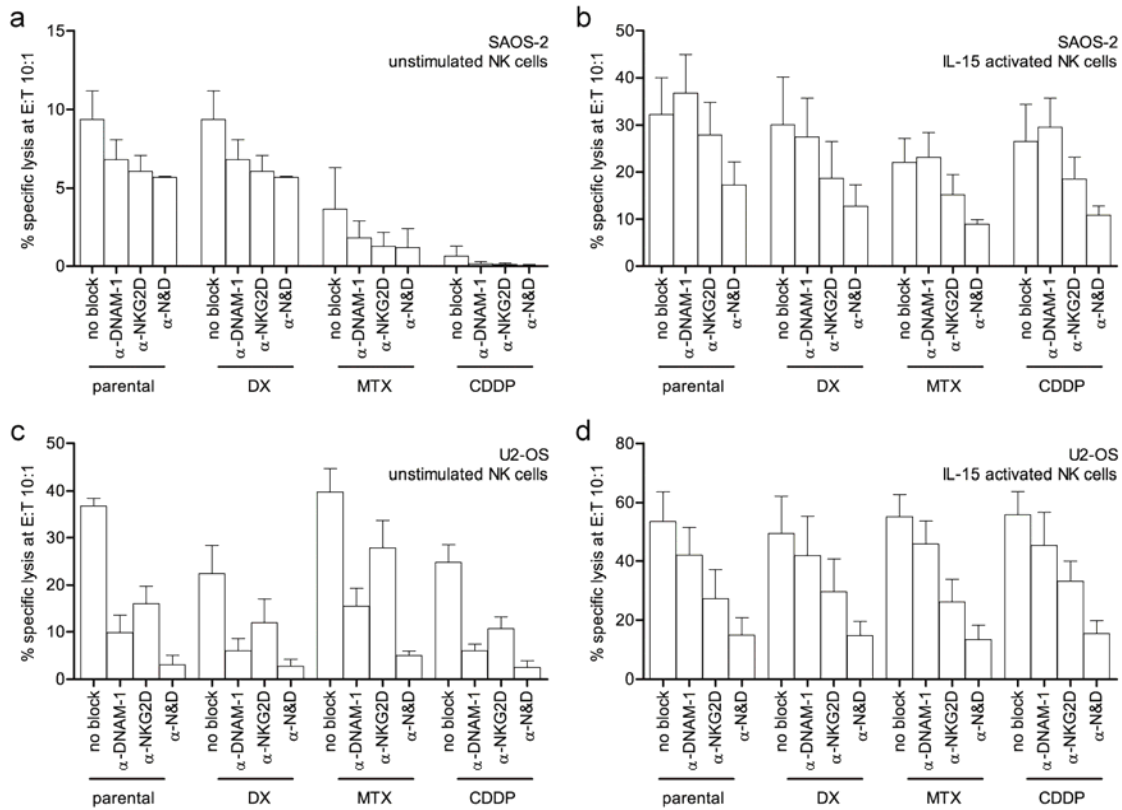

Supplementary figure 1

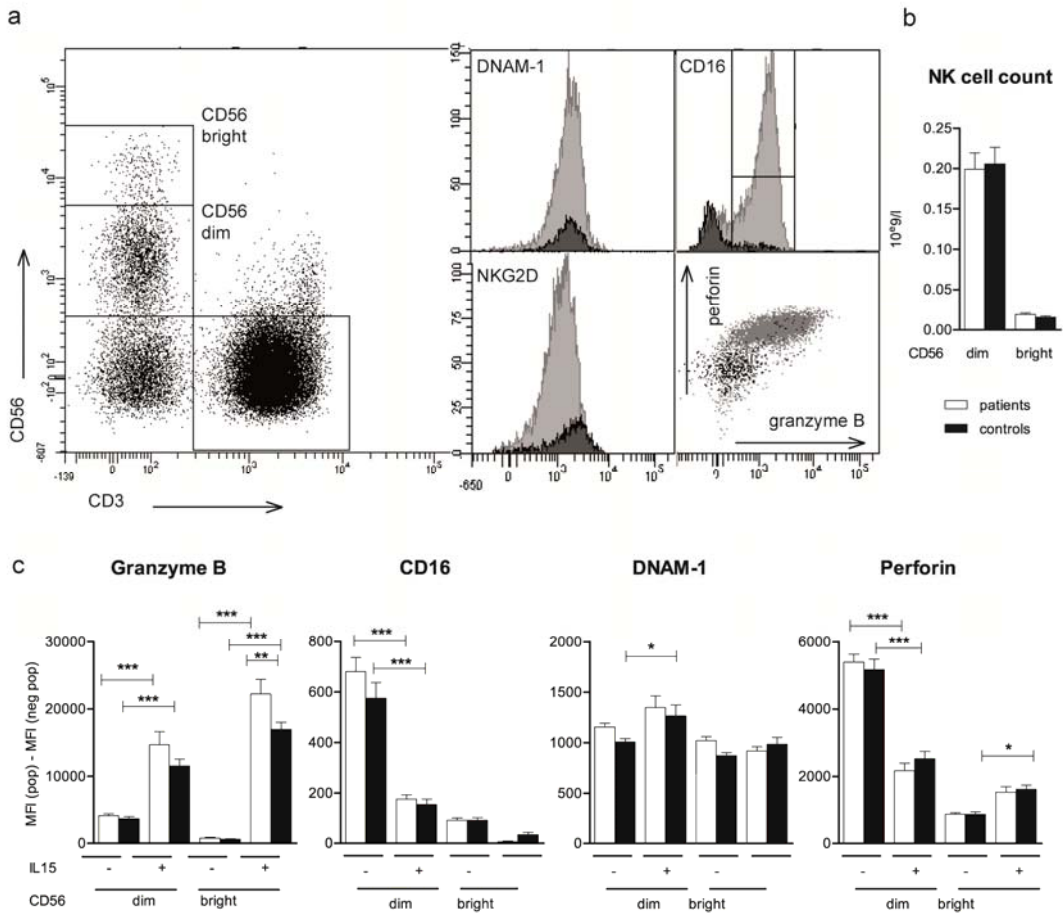

Supplementary figure 2

Supplementary Table 1: Composition of osteosarcoma tissue array

| <i>Number of samples<br/>(of nr of patients)</i> | <i>Type of sample</i>                                   |
|--------------------------------------------------|---------------------------------------------------------|
| 73 (73)                                          | Pre-treatment samples of the primary tumor              |
| 45 (45)                                          | Post-treatment samples of the primary tumor             |
| 20 (13)                                          | Lung metastases                                         |
| 3 (3)                                            | Other metastases (2 bone and one lymph node metastasis) |
| 3 (3)                                            | Local relapses                                          |
| 144 (88)                                         | Total samples                                           |

Supplementary Table 2: Clinicopathological details of patients in this study

|                                  | Tissue array                    | Peripheral blood NK cell analysis |                       |
|----------------------------------|---------------------------------|-----------------------------------|-----------------------|
|                                  |                                 | <i>Osteosarcoma patients</i>      | <i>Healthy donors</i> |
| Total nr of patients             | 88                              | 22                                | 23                    |
| Age in years: median (range)     | 15.4 (4-44)                     | 16 (9-56)                         | 20 (8-55)             |
| <i>Sex</i>                       | n (%)                           | n (%)                             | n (%)                 |
| Male                             | 47 (53.4%)                      | 10 (45.5%)                        | 11 (47.8%)            |
| Female                           | 41 (46.6%)                      | 12 (54.5%)                        | 12 (52.2%)            |
| <i>Location of primary tumor</i> |                                 |                                   |                       |
| Distal femur                     | 40 (45.5%)                      | 11 (50%)                          |                       |
| Proximal tibia/fibula            | 27 (30.7%)                      | 4 (18.2%)                         |                       |
| Proximal humerus                 | 10 (11.4%)                      | 4 (18.2%)                         |                       |
| Other long bones                 | 9 (10.2%)                       | 3 (13.6%)                         |                       |
| Axial skeleton                   | 1 (1.1%)                        | 0                                 |                       |
| Hand                             | 1 (1.1%)                        | 0                                 |                       |
| <i>Histological subtype</i>      |                                 |                                   |                       |
| Conventional osteosarcoma        | 71 (80.7%)                      | 18 (81.8%)                        |                       |
| Osteoblastic                     | 59                              | 12                                |                       |
| Chondroblastic                   | 9                               | 3                                 |                       |
| Fibroblastic                     | 3                               | 1                                 |                       |
| Unusual                          | 8                               | 2                                 |                       |
| Telangiectatic                   | 6 (6.8%)                        | 4 (18.2%)                         |                       |
| High-grade surface osteosarcoma  | 1 (1.1%)                        | 0                                 |                       |
| Small cell osteosarcoma          | 2 (2.3%)                        | 0                                 |                       |
| Date of diagnosis:               | Jan 1981- Sep 2003              | Feb 2007 - Apr 2008               |                       |
| Treated according to protocols:  | EORTC 80831, 80861<br>and 80931 | Euramos-1                         |                       |

Supplementary Table 3: Clinicopathological details of primary cultures

| <i>Primary culture</i> | <i>Origin of primary culture</i> | <i>Sex</i> | <i>Age (y)</i> | <i>Histological subtype of osteosarcoma</i> | <i>Location of primary tumor</i> |
|------------------------|----------------------------------|------------|----------------|---------------------------------------------|----------------------------------|
| L2531                  | Local relapse                    | Male       | 17             | Osteoblastic                                | Distal femur                     |
| L2808                  | Lung metastasis                  | Male       | 18             | Osteoblastic                                | Distal femur                     |
| L2792                  | Local relapse                    | Female     | 31             | Fibroblastic                                | Proximal humerus                 |
| L2599                  | Diagnostic biopsy                | Male       | 13             | Osteoblastic                                | Distal femur                     |
| L2635                  | Diagnostic biopsy                | Female     | 14             | Osteoblastic-sclerosing type                | Distal femur                     |

Supplementary Table 4: Antibodies used for immunohistochemistry (IHC) and flow cytometry (FC)

| <b>Antibody</b>         | <b>Catalog/<br/>clone nr</b> | <b>Company</b>                                                 | <b>Application</b>                                 |
|-------------------------|------------------------------|----------------------------------------------------------------|----------------------------------------------------|
| <b>b2-microglobulin</b> | A0072                        | DAKO (Glostrup, Denmark)                                       | IHC, antigen retrieval (AR): Citrate, 0.01 M, pH 6 |
| <b>HLA-A</b>            | HCA-2                        | Kindly provided by J.Neefjes (NKI, Amsterdam, the Netherlands) | IHC, AR: Citrate, 0.01 M, pH 6                     |
| <b>HLA B/C</b>          | HC10                         | Kindly provided by J.Neefjes                                   | IHC, AR: Citrate, 0.01 M, pH 6                     |
| <b>MICA</b>             | AF1300                       | R&D systems (Minneapolis, MN)                                  | IHC, AR: Citrate, 0.01 M, pH 6                     |
| <b>CD155</b>            | HPA012568                    | Sigma Aldrich (Zwijdrecht, the Netherlands)                    | IHC, AR: EDTA, 1 mM, pH 8                          |
| <b>ULBP-1</b>           | HPA007547                    | Sigma Aldrich                                                  | IHC, AR: Citrate, 0.01 M, pH 6                     |
| <b>CD112</b>            | HPA012759                    | Sigma Aldrich                                                  | IHC, AR: EDTA, 1 mM, pH 8                          |
| <b>MICA</b>             | MAB1300                      | R&D systems                                                    | FC, cell lines                                     |
| <b>MICB</b>             | FAB1599A                     | R&D systems                                                    | FC, cell lines                                     |
| <b>ULBP-1</b>           | IC1380P                      | R&D systems                                                    | FC, cell lines                                     |
| <b>ULBP-2</b>           | FAB1298A                     | R&D systems                                                    | FC, cell lines                                     |
| <b>ULBP-3</b>           | MAB1517                      | R&D systems                                                    | FC, cell lines                                     |
| <b>CD48-PE</b>          | IM1837U                      | Beckman Coulter Immunotech (Marseille, France)                 | FC, cell lines                                     |
| <b>CD155</b>            | IM2755                       | Beckman Coulter Immunotech                                     | FC, cell lines                                     |
| <b>CD112-PE</b>         | IM3452                       | Beckman Coulter Immunotech                                     | FC, cell lines                                     |
| <b>HLA-A/B/C-FITC</b>   | 555552                       | BD Pharmingen (San Diego, CA)                                  | FC, cell lines                                     |
| <b>CD54-PE</b>          | 555511                       | BD Pharmingen                                                  | FC, cell lines                                     |
| <b>CD58-PE</b>          | 555921                       | BD Pharmingen                                                  | FC, cell lines                                     |
| <b>CD95-PE</b>          | 340480                       | BD Pharmingen                                                  | FC, cell lines                                     |



|                            |         |                                     |                            |
|----------------------------|---------|-------------------------------------|----------------------------|
| <b>goat anti-mouse APC</b> | 550826  | BD Pharmingen                       | FC, secondary antibody     |
| <b>mIgG1-FITC</b>          | 639     | Beckman Coulter Immunotech          | FC, isotype control        |
| <b>mIgG2b</b>              | X0944   | DAKO                                | FC, isotype control        |
| <b>mIgG2a</b>              | MAB0031 | R&D                                 | FC, isotype control        |
| <b>mIgG1-PE</b>            | 349053  | BD Pharmingen                       | FC, isotype control        |
| <b>mIgG1</b>               | MAB002  | R&D                                 | FC, isotype control        |
| <b>mIgG2a-PE</b>           | 349053  | BD Pharmingen                       | FC, isotype control        |
| <b>CD3-PerCPCy5.5</b>      | 332771  | BD Pharmingen                       | FC, purity of isolated NKs |
| <b>CD20-FITC</b>           | 345792  | BD Pharmingen                       | FC, purity of isolated NKs |
| <b>CD14-APC</b>            | 340436  | BD Pharmingen                       | FC, purity of isolated NKs |
| <b>CD56-PE</b>             | R7251   | DAKO                                | FC, purity of isolated NKs |
| <b>CD3-Pacific Blue</b>    | 558117  | BD Pharmingen                       | FC, PBMCs                  |
| <b>CD14-PerCPCy5.5</b>     | 550787  | BD Pharmingen                       | FC, PBMCs                  |
| <b>DNAM-PE</b>             | 559789  | BD Pharmingen                       | FC, PBMCs                  |
| <b>GranzymeB-Alexa700</b>  | 557971  | BD Pharmingen                       | FC, PBMCs                  |
| <b>NKG2D-APC</b>           | 558071  | BD Pharmingen                       | FC, PBMCs                  |
| <b>CD56-PECy7</b>          | A21692  | Beckman Coulter Immunotech          | FC, PBMCs                  |
| <b>CD16-FITC</b>           | IM0814  | Beckman Coulter Immunotech          | FC, PBMCs                  |
| <b>Perforin-FITC</b>       | 358-040 | Hözel Diagnostika, Cologne, Germany | FC, PBMCs                  |
